# Supplementary material
Source: MDPI journal article supplement (https://www.mdpi.com/2673-4931/13/1/12)
Supplement: s1 [file s1]

**Ink disease of European chestnut and distribution of associated *Phytophthora* species in Greece**

George T. Tziros

Aristotle University of Thessaloniki, Faculty of Agriculture, Laboratory of Plant Pathology, 54124, Thessaloniki, Greece.

E-mail: gtziros@yahoo.gr

**Introduction**

Ink disease and chestnut blight of European chestnut (*Castanea sativa*) represent the two major threats for chestnut orchards and coppice forests in Greece. However, since the application of biological control of chestnut blight by introducing hypovirulence of *Cryphonectria parasitica* on a nationwide scale in Greece has been successful in limiting chestnut blight, ink disease is an increasing threat as it causes considerable loss.

**Aim**

Investigation of the occurrence of ink disease on chestnut and creation of an updated distribution map of *Phytophthora* spp. in Greece.

**Materials and Methods**

Soil and tissue samples were collected from coppice forests and chestnut orchards. Isolations from soil were carried out by baiting with rhododendron (*Rhododendron catawbiense*) leaves and from tissue by direct plating on selective medium (PARBH<sub>2</sub> agar). The obtained *Phytophthora* isolates were identified on the basis of their morphological and molecular traits.

**Results**

- The presence of ink disease was confirmed all over the country.
- The *Phytophthora* species involved in the disease were recorded.
- A total of seven *Phytophthora* species have been detected.
- *P. cambivora*, *P. cinnamomi* and *P. cryptogea* were recovered both from soil and tissue.
- *P. plurivora*, *P. cactorum*, *P. gonapodyides* and *P. citrophthora* were isolated only from soil.
- *P. cambivora* is the prevailing species in chestnut orchards and natural coppice stands.
- The recent record of the more aggressive *P. cinnamomi* is now considered a potential major threat to *C. sativa* in Greece.
- Trees in both orchards and coppices are affected.
- In coppice forests the disease is restricted in wet locations.
- In orchards the disease appears to be correlated with traditional irrigation methods such as flooding.

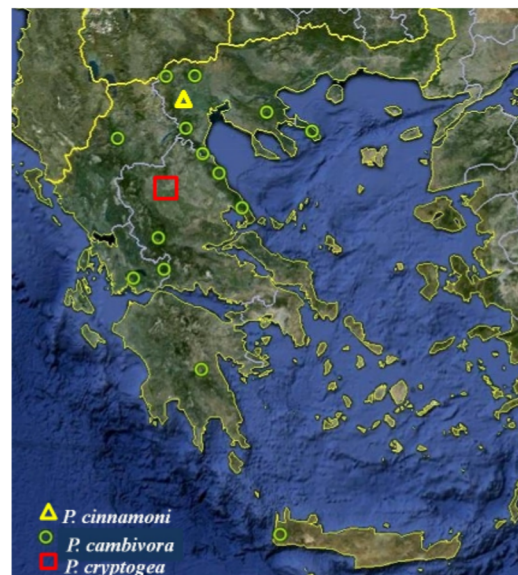

**Figure 1.** Distribution of Ink Disease of chestnut in Greece.

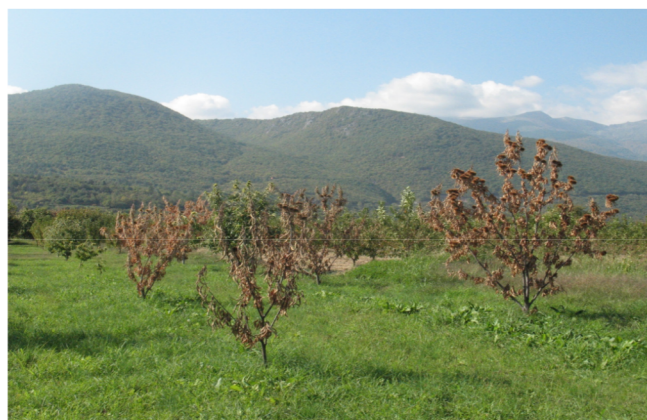

**Figure 2.** Ink disease symptoms on chestnuts in an orchard after flooding due to a leakage in the irrigation system.

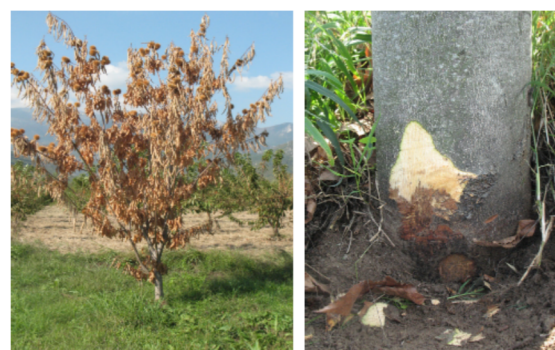

**Figure 3.** Ink disease symptoms on chestnut. Dead leaves and burs remained attached to the tree (left) and dark flame-shaped necrosis at the base of a chestnut tree (right).

**Table1.** *Phytophthora* species isolated from coppice forests and chestnut orchards in Greece.

|                        | Tissue | Soil | Habitat          |
|------------------------|--------|------|------------------|
| <i>P. cambivora</i>    | ✓      | ✓    | Orchard/ Coppice |
| <i>P. cryptogea</i>    | ✓      | ✓    | Orchard          |
| <i>P. cinnamomi</i>    | ✓      | ✓    | Orchard          |
| <i>P. plurivora</i>    | -      | ✓    | Orchard/ Coppice |
| <i>P. cactorum</i>     | -      | ✓    | Orchard          |
| <i>P. gonapodyides</i> | -      | ✓    | Orchard          |
| <i>P. citrophthora</i> | -      | ✓    | Orchard/ Coppice |
